# Supplementary material for: Decaying leaves turn into energy: empowering high-energy-density lithium–sulfur batteries
Source: Royal Society of Chemistry journal article supplement (doi:10.1039/d4nj01325e), 2024-01-01
Supplement: d4nj01325e1.pdf [file d4nj01325e1.pdf]

## Supporting Information

### **Decaying leaves turn into energy: Empowering high-energy-density lithium-sulfur batteries**

**Xiao Wang<sup>a</sup>, Yaozu Jia<sup>\*b</sup>, Di Wang<sup>b</sup>, Xinzhi Ma<sup>\*b</sup>, Hongxu Su<sup>b</sup>,  
Qiong Gao<sup>b</sup>, and Zhikun Xu<sup>\*c</sup>**

<sup>a</sup> College of Forestry, Northwest A&F University, Yangling, Shaanxi 712100, China.

<sup>b</sup> Key Laboratory for Photonic and Electronic Bandgap Materials, Ministry of Education, School of Physics and Electronic Engineering, Harbin Normal University, Harbin, Heilongjiang, 150025 (P. R. China) E-mail: maxz@hrbnu.edu.cn, hsd\_jyz@126.com

<sup>c</sup> School of Science, Guangdong University of Petrochemical Technology, Maoming, Guangdong 525000, PR China. E-mail: xuzhikunnano@163.com

\* Corresponding authors

E-mail address: maxz@hrbnu.edu.cn (Xinzhi Ma)

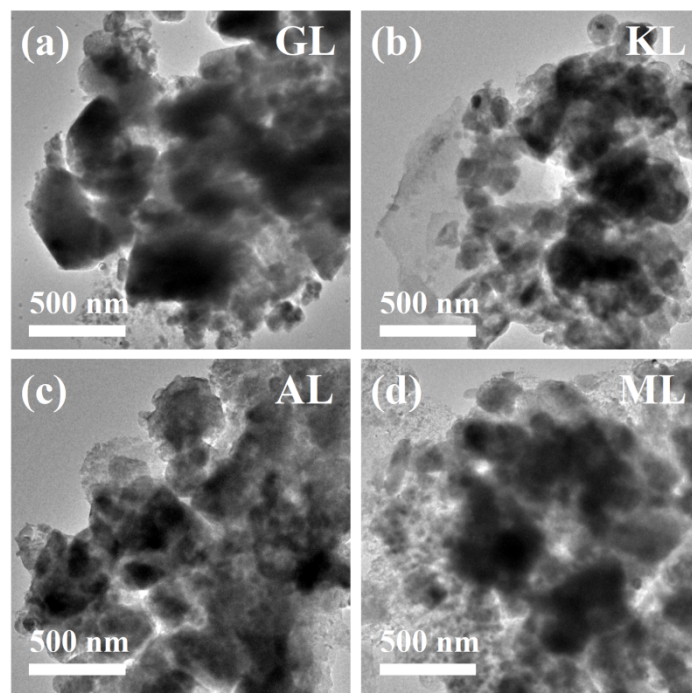

**Fig. S1.** TEM images of (a) GL, (b) KL, (c) AL and (d) ML.

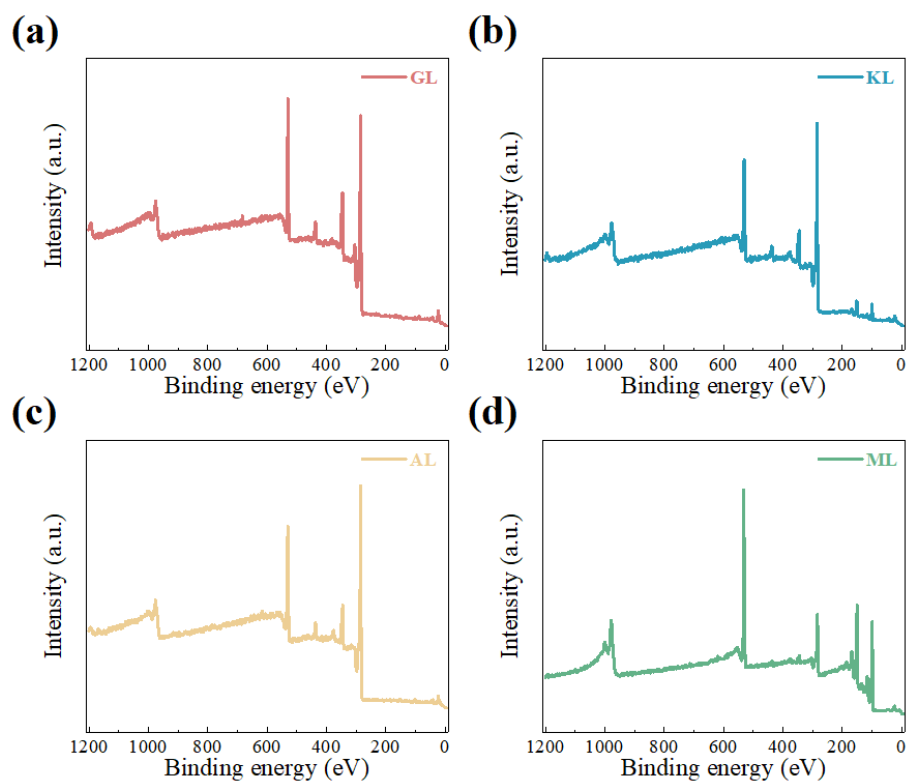

**Fig. S2.** The XPS spectrum of (a) GL, (b) KL, (c) AL and (d) ML.

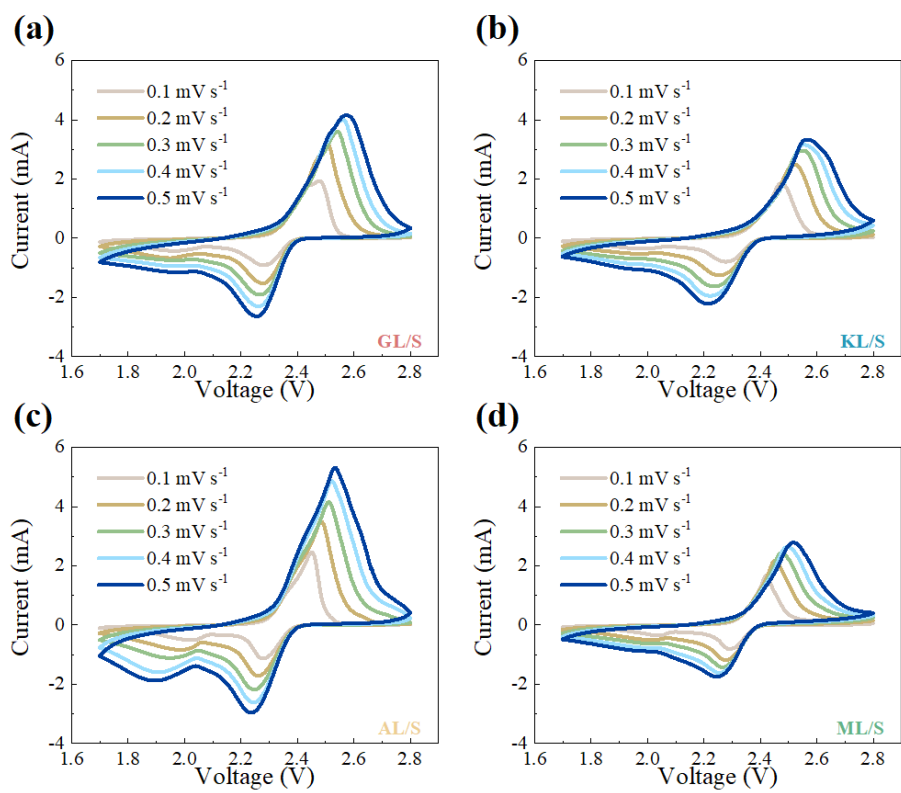

**Fig. S3.** (a-d) CV curves of different cathodes at different scan rates.
